# Supplementary material for: The Required Competencies of Bachelor- and Master-Educated Nurses in Facilitating the Development of an Effective Workplace Culture in Nursing Homes: An Integrative Review
Source: MDPI journal article supplement (doi:10.3390/ijerph191912324), 2022-09-28
Supplement: s1 [file s1]

Supplementary table S1

Table S1. The search strategy in databases.

|                         | English Keywords<br>PubMed |                      | English Keywords<br>CINAHL |                                        | English Keywords<br>PsycINFO |
|-------------------------|----------------------------|----------------------|----------------------------|----------------------------------------|------------------------------|
| <b>#1: Target group</b> | Bachelor[Title/Abstract]   | Education, Nursing,  | <b>Ti</b>                  | MH Education, Nursing,                 | <b>Ti.ab.</b>                |
|                         | Baccalaureate              | Baccalaureate [Mesh] | BSN                        | Research-Based                         | Evidence based               |
|                         | Bachelor's                 | Nursing Education    | Advanced nursing           | MH Education, Nursing,                 | practice                     |
|                         | Undergraduate              | Research [Mesh]      | practice                   | Theory-Based                           | BSN                          |
|                         | BSN                        | Education, Nursing,  | MANP                       | MH Baccalaureate Nurses                | MANP                         |
|                         | practitioner *             | Graduate [Mesh]      | Advanced practice          | MH Education, Nursing,                 | Advanced nursing             |
|                         | Master *                   | Education, Nursing,  | Baccalaureate              | Baccalaureate+                         | practice                     |
|                         | scientist *                | Continuing [Mesh]    | Bachelor                   | MH Education, Nursing,                 | Advanced practice            |
|                         | science                    | Nurses [Mesh]        | Bachelor's                 | Graduate+                              | Baccalaureate                |
|                         | MANP                       | Nurse's Role [Mesh]  | Master                     | MH Advanced Nursing                    | Bachelor                     |
|                         | advanced practice          |                      | Practitioner               | Practice                               | Bachelor's                   |
|                         | advanced nursing           |                      | Science                    | MH Advanced Practice                   | Master *                     |
|                         | practice                   |                      | Scientist                  | Nurses                                 | Practitioner *               |
|                         | specialist *               |                      | Specialist *               | MH Gerontological Advanced Science     |                              |
|                         | Undergraduate              |                      | Undergraduate              | Practice Nurses Association            | Scientist                    |
|                         | Research-based             |                      | Researched-based           | MH Masters-Prepared Nurses             | Specialist *                 |
|                         | Theory-based               |                      | Theory-based               | MH Nursing Practice,<br>Evidence-Based | Undergraduate<br>Nurses      |
|                         | <b>AND</b>                 |                      | <b>AB</b>                  | MH Education, Nursing,<br>Masters      | Nursing education<br>Nursing |
|                         | Nurse                      |                      | BSN                        |                                        |                              |
|                         | Nurses                     |                      | Advanced nursing           | MH Nursing Researchers                 | Nurse<br>Nurses              |
|                         | Nursing                    |                      | practice                   |                                        |                              |
|                         |                            |                      | MANP                       | <b>AND</b>                             |                              |
|                         |                            |                      | Advanced practice          | MH Nurses+                             |                              |
|                         |                            |                      | Baccalaureate              | MH Nursing role                        |                              |
|                         |                            |                      | Bachelor                   | MH Nurses by role+                     |                              |
|                         |                            |                      | Bachelor's                 | MH Nursing Leaders                     |                              |
|                         |                            |                      | Master                     | MH Nursing Practice+                   |                              |

|                             |                                                                                                                                                                                                                                             |                                                                                                                  |                                                                                                                                                                           |                                                                                                                                                                                                           |                                                                                                                                                                                                |                                                                                                                                                             |
|-----------------------------|---------------------------------------------------------------------------------------------------------------------------------------------------------------------------------------------------------------------------------------------|------------------------------------------------------------------------------------------------------------------|---------------------------------------------------------------------------------------------------------------------------------------------------------------------------|-----------------------------------------------------------------------------------------------------------------------------------------------------------------------------------------------------------|------------------------------------------------------------------------------------------------------------------------------------------------------------------------------------------------|-------------------------------------------------------------------------------------------------------------------------------------------------------------|
|                             |                                                                                                                                                                                                                                             |                                                                                                                  | Practitioner<br>Science<br>Scientist<br>Specialist *<br>Undergraduate<br>Researched-based<br>Theory-based                                                                 | MH Gerontologic Nurse<br>Practitioners<br>MH Education, Nursing,<br>Continuing<br>MH Nursing Homes+<br>MH Housing for the elderly<br>MH Long Term Care<br>MH Nursing Home Patients<br>MH Residential care |                                                                                                                                                                                                |                                                                                                                                                             |
| <b>#2: Work<br/>context</b> | Nursing home *<br>Long term care<br>Long term healthcare<br>Long term health care<br>Elderly care<br>Gerontological nurs *<br>Geriatric nurs *<br>Residential care<br>Residential facilit *<br>Housing for the elderly<br>Retirement home * | Nursing home * [Mesh]<br>Residential Facilities<br>[Mesh]<br>Long-Term Care [Mesh]                               | <b>Ti en AB</b><br>Nursing homes<br>Long term care<br>Elderly care<br>Gerontological<br>nursing<br>Residential facility<br>Residential care<br>Housing for the<br>elderly |                                                                                                                                                                                                           | Geriatric nurs *<br>Gerontological<br>nurs *<br>Housing for the<br>elderly<br>Long term health<br>care<br>Nursing home *<br>Residential care<br>Residential facility<br>*<br>Retirement home * | Exp Nursing homes<br>Residential care<br>institutions<br>Long term care<br>Elder care                                                                       |
| <b>#3:<br/>Competencies</b> | Competencies<br>Competenc *<br>Clinical competenc *<br>Nurse competenc *<br>Professional competence<br><br><u>Translation synonyms</u><br>Abilit *<br>Expertise                                                                             | Professional competence<br>[Mesh]<br>Clinical competence<br>[Mesh]<br>Academic success [Mesh]<br>Attitude [Mesh] | <b>Ti en AB</b><br>Competencies<br>Competetenc *<br>Clinical competenc<br>*<br>Nurse competenc *<br>Professional<br>competence<br>Ability *                               | MH Professional<br>Competence+<br>MH Academic Performance<br>MH Attitude<br>MH Attitude of Health<br>Personnel<br>MH Nurse Attitudes<br>MH Attitude to Health<br>MH Cultural sensitivity                  | Competencies<br>Competence *<br>Clinical competenc<br>*<br>Nurse competenc *<br>Professional<br>competence<br>Abilit *<br>Expertise                                                            | Exp Professional<br>competence<br>Exp Performance<br>Exp attitudes<br>Health personnel<br>attitudes<br>Attitudes<br>Cultural sensitivity<br>Cultural change |

|                       |                            |                   |                            |                   |                      |
|-----------------------|----------------------------|-------------------|----------------------------|-------------------|----------------------|
| Capability            | Health Knowledge,          | Expertise         | MH Personal Satisfaction   | Capability        | Exp employee         |
| Skill *               | Attitudes, Practice [Mesh] | Capability        | MH Job satisfaction        | Skill *           | attitudes            |
| Skills mix *          | Social Skills [Mesh]       | Skill *           | MH Social attitudes        | Skills mix *      | Exp job satisfaction |
| Skill mix *           | Metacognition [Mesh]       | Skills mix *      | MH Health knowledge        | Skill mix *       | Social behavior      |
| Skillmix *            | Social Networking [Mesh]   | Skillmix *        | MH Professional knowledge+ | Skillmix *        | Leadership           |
| Tasks                 | Communication [Mesh]       | Skillmix *        | MH Social Skills           | Tasks             | Leadership style     |
| Role *                | Mentoring [Mesh]           | Tasks             | MH Skill Mix+              | Role              | Organizational       |
| Knowledge             | Self-concept [Mesh]        | Role *            | MH Personnel Staffing and  | Knowledge         | behavior             |
| Professional attitude |                            | Knowledge         | Scheduling                 | Professional      | Responsibility       |
| Attitude              | Emotional Intelligence     | Professional      | MH Work Assignments+       | attitude          | Social acceptance    |
| Behaviour             | [Mesh]                     | attitude          | MH Skill Acquisition       | Behavior          | Social networks      |
| Behavior              | Creativity [Mesh]          | Behaviour         | MH Skill Retention         | Behaviour         | Social perception    |
| Communicati *         | Thinking [Mesh]            | Behavior          | MH Lifelong learning       | Communicati *     | Social skills        |
| Leadership            | Leadership [Mesh]          | Communicati *     | MH Personal Growth         | Leadership        | Exp health           |
| Organizational        | Communication barriers     | Leadership        | MH Problem Identification  | Organizational    | knowledge            |
| Organisational        | [Mesh]                     | Organizational    | MH Problem Solving+        | Organisational    | Professional         |
| Analytic *            | Nonverbal                  | Organizational    | MH Transfer                | Analytic *        | development          |
| Critical thinking     | communication [Mesh]       | Analytic *        | MH Learning+               | Critical thinking | Development          |
| Awareness             | Verbal behavior [Mesh]     | Critical thinking | MH Cognition               | Awareness         | Exp social skills    |
| Creativity            | Mentors [Mesh]             | Awareness         | MH Consciousness           | Creativity        | Working conditions   |
| Empathy               | Personality development    | Creativity        | MH Intuition               | Empathy           | Skill learning       |
| Networking            | [Mesh]                     | Empathy           | MH Communication           | Networking        | Learning             |
| Persuasiveness        | Personality [Mesh]         | Networking        | MH Communication Barriers  | Persuasiveness    | Learning strategies  |
| Decisiveness          | Identity crises [Mesh]     | Persuasiveness    | MH Communication Skills    | Decisiveness      | Personality          |
| Coaching              | Individuation [Mesh]       | Decisiveness      | MH Conversation            | Coaching          | development          |
| Flexibility           | Intelligence [Mesh]        | Coaching          | MH Nonverbal               | Flexibility       | Exp problem based    |
| Self confidence       | Evidence-Based Nursing     | Flexibility       | communication              | Self confidence   | learning             |
| Integrity             | [Mesh]                     | Self confidence   | MH Social Networking       | Integrity         | Exp decision making  |
| Vision                |                            | Integrity         | MH Verbal Behavior+        | Vision            | Problem solving      |
| Entrepreneur          |                            | Vision            | MH Body Language           | Enerpreneur       | Declarative          |
| Conversation          |                            | Entrepreneur      | MH Presence                | Conversation      | knowledge            |
| Nonverbal             |                            | Conversation      | MH Mentorship              | Nonverbal         | Inductive deductive  |
| communication         |                            |                   | MH Personality Development | communication     | reasoning            |

|                         |                 |                            |                 |                     |
|-------------------------|-----------------|----------------------------|-----------------|---------------------|
| Body language           | Nonverbal       | MH Self concept+           | Body language   | Reasoning           |
| Presence                | communication   | MH Identity Crisis         | Presence        | Exp knowledge       |
| Mentor *                | Body language   | MH Individuation           | Mentor *        | (general)           |
| Personality             | Presence        | MH Professional Boundaries | Personality     | Cognitive processes |
| development             | Mentor *        | MH Personal Boundaries+    | development     | Metacognition       |
| Self concept            | Personality     | MH Intelligence+           | Self concept    | Exp intuition       |
| Personal boundaries     | development     | MH Thinking+               | Personal        | Communication       |
| Identity crisis         | Self concept    | MH Personality+            | boundaries      | skills              |
| Individuation           | Personal        | MH Reflection              | Identity crises | Exp ability         |
| Intelligence            | boundaries      |                            | Individuation   | Exp conversation    |
| Reflect *               | Identity crisis |                            | Intelligence    | Communication       |
| Evidence based practice | Individuation   |                            | Reflect *       | Nonverbal           |
| Evidence based nursing  | Intelligence    |                            | Evidence based  | communication       |
|                         | Reflect *       |                            | practice        | Persuasive          |
|                         | Evidence based  |                            | Evidence based  | communication       |
|                         | practice        |                            | nursing         | Verbal              |
|                         | Evidence based  |                            |                 | communication       |
|                         | nursing         |                            |                 | Mentor              |
|                         |                 |                            |                 | Identity crisis     |
|                         |                 |                            |                 | Professional        |
|                         |                 |                            |                 | standards           |
|                         |                 |                            |                 | Intelligence        |
|                         |                 |                            |                 | Emotional           |
|                         |                 |                            |                 | intelligence        |
|                         |                 |                            |                 | Thinking            |
|                         |                 |                            |                 | Critical thinking   |
|                         |                 |                            |                 | Logical thinking    |
|                         |                 |                            |                 | Rationality         |
|                         |                 |                            |                 | Reasoning           |
|                         |                 |                            |                 | Personality         |
|                         |                 |                            |                 | Self-actualization  |
|                         |                 |                            |                 | Self-concept        |
|                         |                 |                            |                 | Self-determination  |

Self-expression  
Self-monitoring  
(personality)  
Cognitive style  
Reflectiveness  
feedback

\*Search for word variations and words that begin with a word stem

| PubMed                                                                                                                                                                                                                                                                                                                                                                                                                                                                                                                                                                                                                                                                                                                                                                                                                                                                                                |                      |
|-------------------------------------------------------------------------------------------------------------------------------------------------------------------------------------------------------------------------------------------------------------------------------------------------------------------------------------------------------------------------------------------------------------------------------------------------------------------------------------------------------------------------------------------------------------------------------------------------------------------------------------------------------------------------------------------------------------------------------------------------------------------------------------------------------------------------------------------------------------------------------------------------------|----------------------|
|                                                                                                                                                                                                                                                                                                                                                                                                                                                                                                                                                                                                                                                                                                                                                                                                                                                                                                       | Results              |
| <b>#1 Target group</b> (“Nursing Education Research”[Mesh] OR “Education, Nursing, Baccalaureate”[Mesh] OR “Education, Nursing, Graduate”[Mesh] OR BSN[tiab] OR MANP[tiab] OR advanced nursing practice[tiab] OR ((advanced practice [tiab] OR Baccalaureate[tiab] OR Bachelor [tiab] OR Bachelor’s [tiab] OR Master*[tiab] OR practitioner*[tiab] OR science[tiab] OR scientist*[tiab] OR specialist*[tiab] OR Undergraduate[tiab] OR researched-based[tiab] OR theory-based[tiab])) AND (Nurses [Mesh] OR “Nurse’s Role”[Mesh] OR “Education, Nursing, Continuing”[Mesh] OR nurse[tiab] OR Nurses[tiab] OR Nursing[tiab]))                                                                                                                                                                                                                                                                          | <b>#1: 79.553</b>    |
| <b>#2 Work context</b> (Nursing home [Mesh] OR Residential Facilities [Mesh] OR “Long-Term Care”[Mesh] OR Elderly care[tiab] OR Geriatric nurs*[tiab] OR Gerontological nurs*[tiab] OR Housing for the elderly[tiab] OR Long term care[tiab] OR Long term health care[tiab] OR Long term healthcare[tiab] OR Nursing home*[tiab] OR Residential care[tiab] OR Residential facilit*[tiab] OR Retirement home*[tiab])                                                                                                                                                                                                                                                                                                                                                                                                                                                                                   | <b>#2: 97.025</b>    |
| <b>#3 Competencies</b> “professional competence”[MeSH Terms] OR “clinical competence”[MeSH Terms] OR “academic success”[MeSH Terms] OR “attitude”[MeSH Terms] OR “health knowledge, attitudes, practice”[MeSH Terms] OR “social skills”[MeSH Terms] OR “metacognition”[MeSH Terms] OR “social networking”[MeSH Terms] OR “communication”[MeSH Terms] OR “mentoring”[MeSH Terms] OR “self concept”[MeSH Terms] OR “emotional intelligence”[MeSH Terms] OR “creativity”[MeSH Terms] OR “thinking”[MeSH Terms] OR “Leadership”[MeSH Terms] OR “communication barriers”[Mesh Terms] OR “nonverbal communication”[Mesh Terms] OR “verbal behavior”[Mesh Terms] OR “mentors”[MeSH Terms] OR “personality development”[Mesh Terms] OR “identity crisis”[Mesh terms] OR “individuation”[Mesh Terms] OR “intelligence”[Mesh Terms] OR “personality” [Mesh Terms] OR “Evidence-Based Nursing”[MeSH Terms]<br>OR | <b>#3: 8,481,999</b> |

|                                                                                                                                                                                                                                                                                                                                                                                                                                                                                                                                                                                                                                                                                                                                                                                                                                                                                                                                                                                                                                                                                                                                                                                                                                                                                                                                                                                                                                                                                                                                                                                                                                                                                     |                                                                                                                                                                                                                                                                                                                                                                                                                                                                                                                                                                                                                                                                                                                                                                                                                                                                                                                                                                                                                                                                                                                                                                                                                                                                                                                                                               |
|-------------------------------------------------------------------------------------------------------------------------------------------------------------------------------------------------------------------------------------------------------------------------------------------------------------------------------------------------------------------------------------------------------------------------------------------------------------------------------------------------------------------------------------------------------------------------------------------------------------------------------------------------------------------------------------------------------------------------------------------------------------------------------------------------------------------------------------------------------------------------------------------------------------------------------------------------------------------------------------------------------------------------------------------------------------------------------------------------------------------------------------------------------------------------------------------------------------------------------------------------------------------------------------------------------------------------------------------------------------------------------------------------------------------------------------------------------------------------------------------------------------------------------------------------------------------------------------------------------------------------------------------------------------------------------------|---------------------------------------------------------------------------------------------------------------------------------------------------------------------------------------------------------------------------------------------------------------------------------------------------------------------------------------------------------------------------------------------------------------------------------------------------------------------------------------------------------------------------------------------------------------------------------------------------------------------------------------------------------------------------------------------------------------------------------------------------------------------------------------------------------------------------------------------------------------------------------------------------------------------------------------------------------------------------------------------------------------------------------------------------------------------------------------------------------------------------------------------------------------------------------------------------------------------------------------------------------------------------------------------------------------------------------------------------------------|
| <p> “Competencies”[Title/Abstract] OR “competenc*”[Title/Abstract] OR “clinical competenc*”[Title/Abstract] OR “nurse competenc*”[Title/Abstract] OR “professional competence”[Title/Abstract] OR “abilit*”[Title/Abstract] OR “Expertise”[Title/Abstract] OR “Capability”[Title/Abstract] OR “skill*”[Title/Abstract] OR “skills mix*”[Title/Abstract] OR “skill mix*”[Title/Abstract] OR “skillmix*”[Title/Abstract] OR “Tasks”[Title/Abstract] OR “role*”[Title/Abstract] OR “Knowledge”[Title/Abstract] OR “professional attitude”[Title/Abstract] OR “Behaviour”[Title/Abstract] OR “Behavior”[Title/Abstract] OR “communicati*”[Title/Abstract] OR “Leadership”[Title/Abstract] OR “organizational”[Title/Abstract] OR “organisational”[Title/Abstract] OR “analytic*”[Title/Abstract] OR “critical thinking”[Title/Abstract] OR “awareness”[Title/Abstract] OR “creativity”[Title/Abstract] OR “empathy”[Title/Abstract] OR “networking”[Title/Abstract] OR “persuasiveness”[Title/Abstract] OR “decisiveness”[Title/Abstract] OR “coaching”[Title/Abstract] OR “flexibility”[Title/Abstract] OR “self confidence”[Title/Abstract] OR “integrity”[Title/Abstract] OR “vision”[Title/Abstract] OR “entrepreneur*”[Title/Abstract] OR “conversation” OR “nonverbal communication” OR “body language” OR “presence” OR “mentor*”[Title/Abstract] OR “personality development”[Title/Abstract] OR “self concept” OR “personal boundaries” OR “identity crisis”[Title/Abstract] OR “individuation”[Title/Abstract] OR “intelligence”[Title/Abstract] OR “reflect*” [Title/Abstract] OR “evidence based practice”[Title/Abstract] OR “evidence based nursing”[Title/Abstract] </p> |                                                                                                                                                                                                                                                                                                                                                                                                                                                                                                                                                                                                                                                                                                                                                                                                                                                                                                                                                                                                                                                                                                                                                                                                                                                                                                                                                               |
| #1 AND #2 AND #3                                                                                                                                                                                                                                                                                                                                                                                                                                                                                                                                                                                                                                                                                                                                                                                                                                                                                                                                                                                                                                                                                                                                                                                                                                                                                                                                                                                                                                                                                                                                                                                                                                                                    | 2.092                                                                                                                                                                                                                                                                                                                                                                                                                                                                                                                                                                                                                                                                                                                                                                                                                                                                                                                                                                                                                                                                                                                                                                                                                                                                                                                                                         |
| Filter by publication date <10 year                                                                                                                                                                                                                                                                                                                                                                                                                                                                                                                                                                                                                                                                                                                                                                                                                                                                                                                                                                                                                                                                                                                                                                                                                                                                                                                                                                                                                                                                                                                                                                                                                                                 | 1.075                                                                                                                                                                                                                                                                                                                                                                                                                                                                                                                                                                                                                                                                                                                                                                                                                                                                                                                                                                                                                                                                                                                                                                                                                                                                                                                                                         |
| CINAHL                                                                                                                                                                                                                                                                                                                                                                                                                                                                                                                                                                                                                                                                                                                                                                                                                                                                                                                                                                                                                                                                                                                                                                                                                                                                                                                                                                                                                                                                                                                                                                                                                                                                              |                                                                                                                                                                                                                                                                                                                                                                                                                                                                                                                                                                                                                                                                                                                                                                                                                                                                                                                                                                                                                                                                                                                                                                                                                                                                                                                                                               |
| #1 Target group                                                                                                                                                                                                                                                                                                                                                                                                                                                                                                                                                                                                                                                                                                                                                                                                                                                                                                                                                                                                                                                                                                                                                                                                                                                                                                                                                                                                                                                                                                                                                                                                                                                                     | <p> (MH “Education, Nursing, Research-Based”) OR (MH “Research, Nursing”) OR (MH “Education, Nursing, Masters”) OR (MH “Education, Nursing, Theory-Based”) OR (MH “Baccalaureate Nurses”) OR (MH “Education, Nursing, Baccalaureate+”) OR (MH “Education, Nursing, Graduate+”) OR (MH “Advanced Nursing Practice+”) OR (MH “Advanced Practice Nurses+”) OR (MH “Gerontological Advanced Practice Nurses Association”) OR (MH “Masters-Prepared Nurses”) OR (MH “Nursing Practice, Evidence-Based+”) OR (MH “Education, Nursing, Masters”) OR (MH “Nurse Researchers”) OR (MH “Advanced Practice Nurses+”) OR (MH “Nurse Researchers”) OR TI (“bsn” OR “advanced nursing practice” OR “MANP”) OR AB (“bsn” OR “advanced nursing practice” OR “MANP”) OR ((TI (“advanced practice” OR “baccalaureate” OR “bachelor” OR “<b>Bachelor’s</b>” OR <b>Master*</b> OR “practitioner*” OR “science” OR “scientist*” OR “specialist*” OR “undergraduate” OR “researched-based” OR “theory-based”) OR AB (“advanced practice” OR “baccalaureate” OR “bachelor” OR “<b>Bachelor’s</b>” OR <b>Master*</b> OR “practitioner*” OR “science” OR “scientist*” OR “specialist*” OR “undergraduate” OR “researched-based” OR “theory-based”)) AND ((MH “Nurses+”) OR (MH “Nursing Role”) OR (MH “Nurses by Role+”) OR (MH “Nursing Leaders”) OR (MH “Nursing Practice+”) OR </p> |

|                        |                                                                                                                                                                                                                                                                                                                                                                                                                                                                                                                                                                                                                                                                                                                                                                                                                                                                                                                                                                                                                                                                                                                                                                                                                                                                                                                                                                                                                                                                                                                                                                                                                                                                                                                                                                                                                                                                                                                                                                                                                                                                                                                                                                                                                                                                                          |                      |
|------------------------|------------------------------------------------------------------------------------------------------------------------------------------------------------------------------------------------------------------------------------------------------------------------------------------------------------------------------------------------------------------------------------------------------------------------------------------------------------------------------------------------------------------------------------------------------------------------------------------------------------------------------------------------------------------------------------------------------------------------------------------------------------------------------------------------------------------------------------------------------------------------------------------------------------------------------------------------------------------------------------------------------------------------------------------------------------------------------------------------------------------------------------------------------------------------------------------------------------------------------------------------------------------------------------------------------------------------------------------------------------------------------------------------------------------------------------------------------------------------------------------------------------------------------------------------------------------------------------------------------------------------------------------------------------------------------------------------------------------------------------------------------------------------------------------------------------------------------------------------------------------------------------------------------------------------------------------------------------------------------------------------------------------------------------------------------------------------------------------------------------------------------------------------------------------------------------------------------------------------------------------------------------------------------------------|----------------------|
|                        | (MH "Gerontologic Nurse Practitioners") OR (MH "Education, Nursing, Continuing") OR TI ("nurse" OR "nurses" OR "nursing") OR AB ("nurse" OR "nurses" OR "nursing"))                                                                                                                                                                                                                                                                                                                                                                                                                                                                                                                                                                                                                                                                                                                                                                                                                                                                                                                                                                                                                                                                                                                                                                                                                                                                                                                                                                                                                                                                                                                                                                                                                                                                                                                                                                                                                                                                                                                                                                                                                                                                                                                      |                      |
| <b>#2 Work context</b> | (MH "Nursing Homes+") OR (MH "Housing for the Elderly") OR (MH "Long Term Care") OR (MH "Nursing Home Patients") OR (MH "Residential Facilities") OR (MH "Residential Care") OR<br>TI ("Nursing homes" OR "long term care" OR "elderly care" OR "gerontological nursing" OR "residential facility" OR "residential care" OR "housing for the elderly") OR<br>AB ("Nursing homes" OR "long term care" OR "elderly care" OR "gerontological nursing" OR "residential facility" OR "residential care" OR "housing for the elderly")                                                                                                                                                                                                                                                                                                                                                                                                                                                                                                                                                                                                                                                                                                                                                                                                                                                                                                                                                                                                                                                                                                                                                                                                                                                                                                                                                                                                                                                                                                                                                                                                                                                                                                                                                         | <b>#2: 76,363</b>    |
| <b>#3 Competencies</b> | (MH "Professional Competence+") OR (MH "Academic Performance") OR (MH "Attitude") OR (MH "Attitude of Health Personnel") OR (MH "Nurse Attitudes") OR (MH "Attitude to Health") OR (MH "Cultural Sensitivity") OR (MH "Personal Satisfaction") OR (MH "Job Satisfaction") OR (MH "Social Attitudes") OR (MH "Health Knowledge") OR (MH "Professional Knowledge+") OR (MH "Social Skills") OR (MH "Skill Mix+") OR (MH "Personnel Staffing and Scheduling") OR (MH "Work Assignments+") OR (MH "Skill Acquisition") OR (MH "Skill Retention") OR (MH "Lifelong Learning") OR (MH "Personal Growth") OR (MH "Problem Identification") OR (MH "Problem Solving+") OR (MH "Transfer (Psychology)") OR (MH "Learning+") OR (MH "Cognition") OR (MH "Consciousness") OR (MH "Intuition") OR (MH "Communication") OR (MH "Communication Barriers") OR (MH "Communication Skills") OR (MH "Conversation") OR (MH "Nonverbal Communication") OR (MH "Social Networking+") OR (MH "Verbal Behavior+") OR (MH "Body Language") OR (MH "Presence") OR (MH "Mentorship") OR (MH "Personality Development") OR (MH "Self Concept+") OR (MH "Identity Crisis") OR (MH "Individuation") OR (MH "Professional Boundaries") OR (MH "Personal Boundaries+") OR (MH "Intelligence+") OR (MH "Thinking+") OR (MH "Personality+") OR (MH "Reflection")<br>OR<br>TI ( "Competencies" OR "competenc*" OR "clinical competenc*" OR "nurse competenc*" OR "professional competence" OR "abilit*" OR "Expertise" OR "Capability" OR "skill*" OR "skills mix*" OR "skill mix*" OR "skillmix*" OR "Tasks" OR "role*" OR "Knowledge" OR "professional attitude" OR "Behaviour" OR "Behavior" OR "communicati*" OR "Leadership" OR "organizational" OR "organisational" OR "analytic*" OR "critical thinking" OR "awareness" OR "creativity" OR "empathy" OR "networking" OR "persuasiveness" OR "decisiveness" OR "coaching" OR "flexibility" OR "self confidence" OR "integrity" OR "vision" OR "entrepreneur*" OR "conversation" OR "nonverbal communication" OR "body language" OR "presence" OR "mentor*" OR "personality development" OR "self concept" OR "personal boundaries" OR "identity crisis" OR individuation OR "intelligence" OR "reflect*" OR "evidence based practice" OR "evidence based nursing" ) | <b>#3: 1,709,068</b> |

|                 |                                                                                                                                                                                                                                                                                                                                                                                                                                                                                                                                                                                                                                                                                                                                                                                                                                                                                                                                                                                                                                                                                                                                                                                                                                                                                             |           |
|-----------------|---------------------------------------------------------------------------------------------------------------------------------------------------------------------------------------------------------------------------------------------------------------------------------------------------------------------------------------------------------------------------------------------------------------------------------------------------------------------------------------------------------------------------------------------------------------------------------------------------------------------------------------------------------------------------------------------------------------------------------------------------------------------------------------------------------------------------------------------------------------------------------------------------------------------------------------------------------------------------------------------------------------------------------------------------------------------------------------------------------------------------------------------------------------------------------------------------------------------------------------------------------------------------------------------|-----------|
|                 | OR<br>AB ( "Competencies" OR "competenc*" OR "clinical competenc*" OR "nurse competenc*" OR "professional competence" OR "abilit*" OR "Expertise" OR "Capability" OR "skill*" OR "skills mix*" OR "skill mix*" OR "skillmix*" OR "Tasks" OR "role*" OR "Knowledge" OR "professional attitude" OR "Behaviour" OR "Behavior" OR "communicati*" OR "Leadership" OR "organizational" OR "organisational" OR "analytic*" OR "critical thinking" OR "awareness" OR "creativity" OR "empathy" OR "networking" OR "persuasiveness" OR "decisiveness" OR "coaching" OR "flexibility" OR "self confidence" OR "integrity" OR "vision" OR "entrepreneur*" OR "conversation" OR "nonverbal communication" OR "body language" OR "presence" OR "mentor*" OR "personality development" OR "self concept" OR personal boundaries" OR "identity crisis" OR individuation" OR "intelligence" OR "reflect*" OR "evidence based practice" OR "evidence based nursing" )                                                                                                                                                                                                                                                                                                                                        |           |
|                 | #1 AND #2 AND #3                                                                                                                                                                                                                                                                                                                                                                                                                                                                                                                                                                                                                                                                                                                                                                                                                                                                                                                                                                                                                                                                                                                                                                                                                                                                            | 1.862     |
|                 | Filter by publication date <10 year                                                                                                                                                                                                                                                                                                                                                                                                                                                                                                                                                                                                                                                                                                                                                                                                                                                                                                                                                                                                                                                                                                                                                                                                                                                         | 1.098     |
|                 | PsyINFO                                                                                                                                                                                                                                                                                                                                                                                                                                                                                                                                                                                                                                                                                                                                                                                                                                                                                                                                                                                                                                                                                                                                                                                                                                                                                     |           |
| #1 Target group | evidence based practice/ OR (BSN OR MANP OR advanced nursing practice).ti,ab. OR (((advanced practice OR Baccalaureate OR Bachelor OR Bachelor's OR Master* OR practitioner* OR science OR scientist* OR specialist* OR Undergraduate).ti,ab.) AND (nurses/ OR nursing education/ OR nursing/ OR (nurse OR Nurses OR Nursing).ti,ab.))                                                                                                                                                                                                                                                                                                                                                                                                                                                                                                                                                                                                                                                                                                                                                                                                                                                                                                                                                      | 34.418    |
| #2 Work context | exp Nursing Homes/ or residential care institutions/ or long term care/ or elder care/ OR (Elderly care OR Geriatric nurs* OR Gerontological nurs* OR Housing for the elderly OR Long term care OR Long term health care OR Long term healthcare OR Nursing home* OR Residential care OR Residential facilit* OR Retirement home*).ti,ab.                                                                                                                                                                                                                                                                                                                                                                                                                                                                                                                                                                                                                                                                                                                                                                                                                                                                                                                                                   | 35.291    |
| #3 Competencies | exp Professional Competence/ OR exp Performance/ OR exp Attitudes/ OR health personnel attitudes/ OR attitudes/ OR exp Cultural Sensitivity/ OR culture change/ OR exp employee attitudes/ OR exp job satisfaction/ OR social behavior/ OR leadership/ OR leadership style/ OR organizational behavior/ OR responsibility/ OR social acceptance/ OR social networks/ OR social perception/ OR social skills/ OR exp Health Knowledge/ OR professional development/ OR development/ OR exp Social Skills/ OR working conditions/ OR skill learning/ OR learning/ OR learning strategies/ OR personality development/ OR exp problem based learning/ OR exp decision making/ OR problem solving/ OR declarative knowledge/ OR inductive deductive reasoning/ OR reasoning/ OR exp "knowledge (general)"/ OR cognitive processes/ OR metacognition/ OR exp Intuition/ OR communication skills/ OR exp ability/ OR exp conversation/ OR communication/ OR nonverbal communication/ OR persuasive communication/ OR verbal communication/ OR mentor/ or identity crisis/ OR professional standards/ OR intelligence/ OR emotional intelligence/ OR thinking/ OR critical thinking/ OR logical thinking/ OR rationality/ OR reasoning/ OR personality/ OR self-actualization/ OR self-concept/ OR | 2.791.172 |



---

self-determination/ OR self-expression/ OR “self-monitoring (personality)”/ OR cognitive style/ OR reflectiveness/ OR feedback/

OR

(Competencies OR competenc\* OR clinical competenc\* OR nurse competenc\* OR professional competence OR abilit\* OR Expertise OR Capability OR skill\* OR skills mix\* OR skill mix\* OR skillmix\* OR Tasks OR role\* OR Knowledge OR professional attitude OR Behaviour OR Behavior OR communicati\* OR Leadership OR organizational OR organisational OR analytic\* OR critical thinking OR awareness OR creativity OR empathy OR networking OR persuasiveness OR decisiveness OR coaching OR flexibility OR self confidence OR integrity OR vision OR entrepreneur\* OR conversation OR nonverbal communication OR body language OR presence OR mentor\* OR personality development OR self concept OR personal boundaries OR identity crisis OR individuation OR intelligence OR reflect\* OR evidence based practice OR evidence based nursing). ti,ab.

---

#1 AND #2 AND #3

799

---

Filter by publication date <10 year

473

---

Total number of articles [PubMed, CINAHL and PsycINFO]

2,646

---

Removing duplicates via Endnote

1978

---
